# Supplementary material
Source: PubMed Central journal article supplement (PMC2880454)

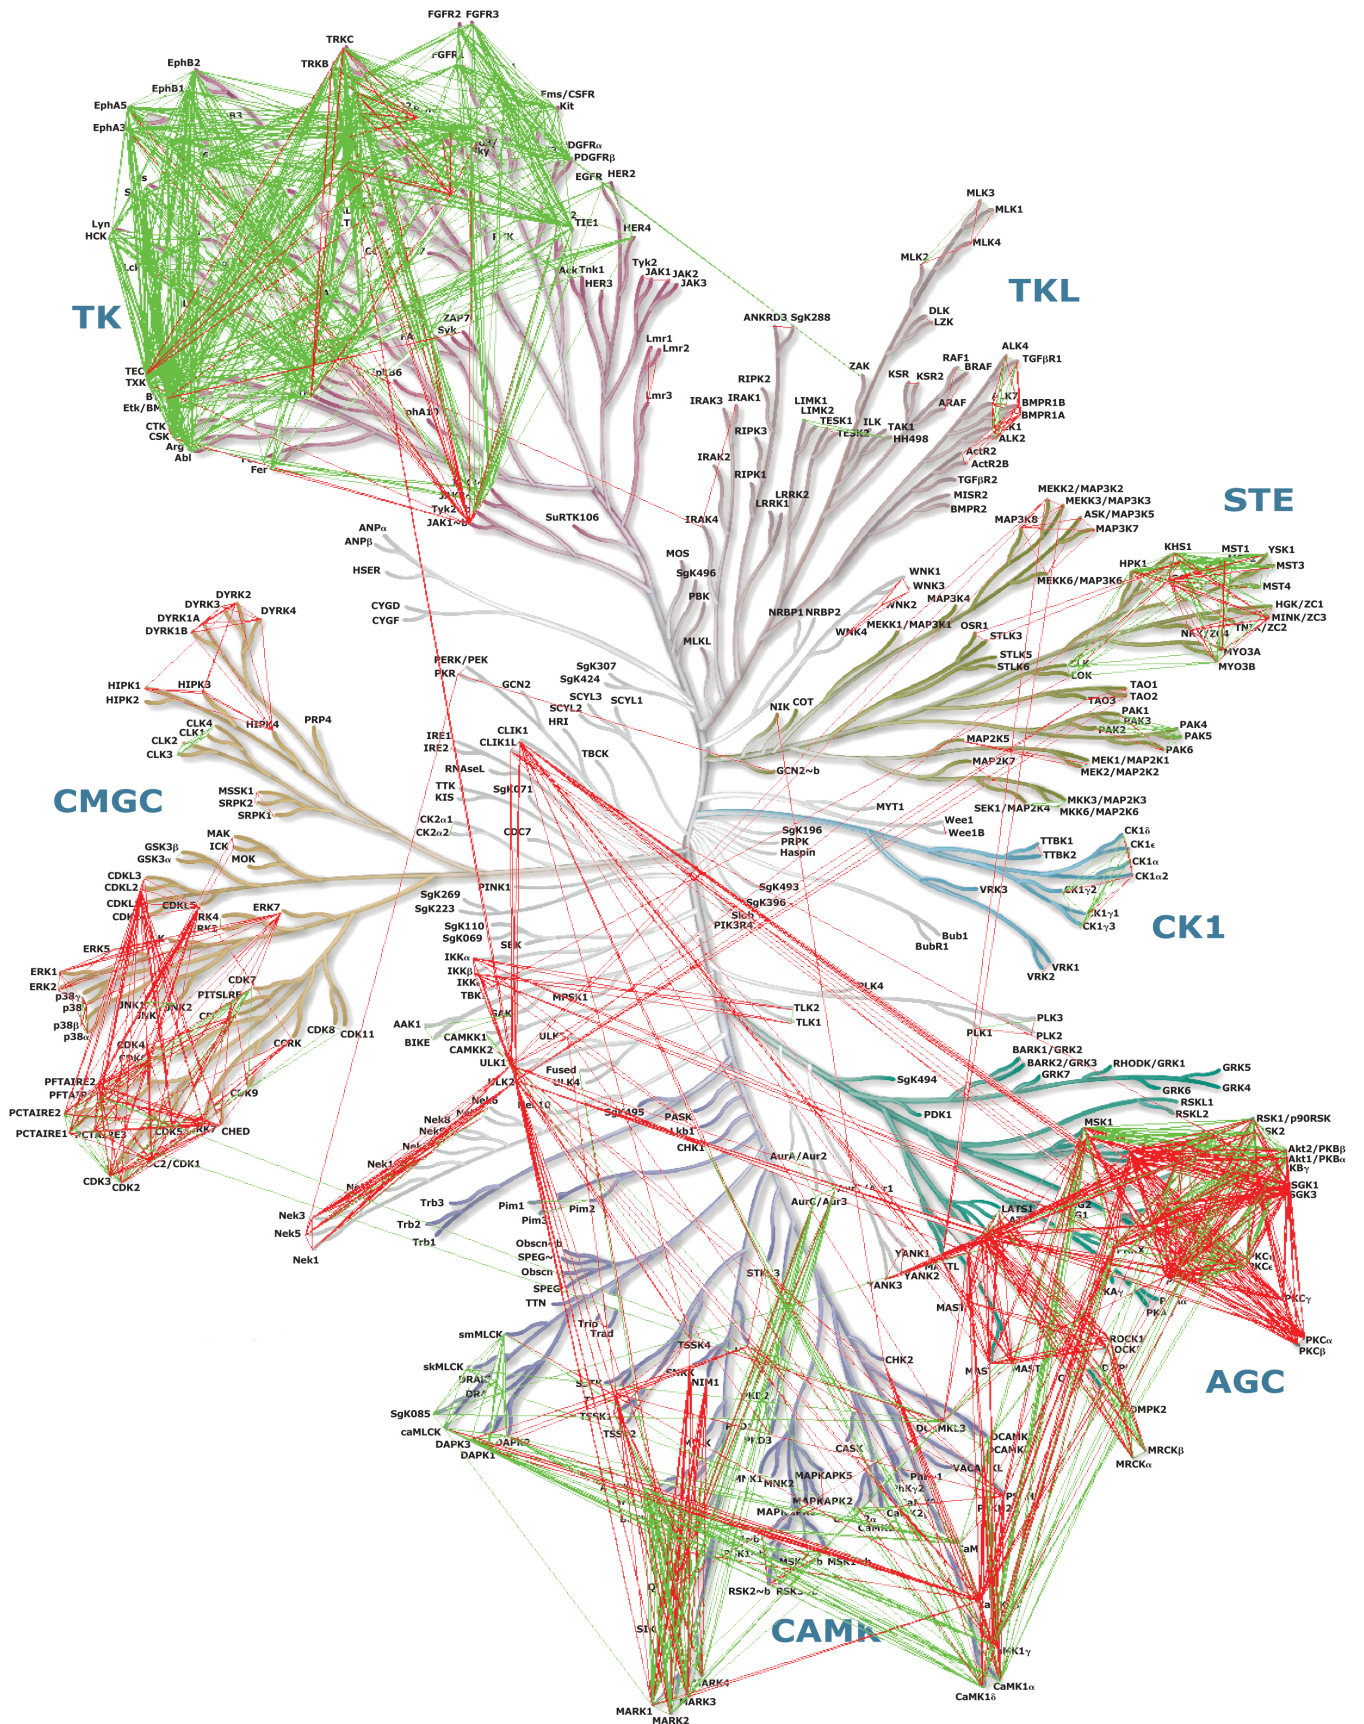

Figure 5

Supplement: NIHMS185280-supplement-S1.pdf [file NIHMS185280-supplement-S1.pdf]
